# Supplementary material for: Highly fluorescent solid-state benzothiadiazole derivatives as saturated red emitters for efficient solution-processed non-doped electroluminescent devices
Source: Royal Society of Chemistry journal article supplement (doi:10.1039/d0tc02131h), 2020-01-01

## Supporting Information

### Highly fluorescent solid-state benzothiadiazole derivatives as saturated red emitters for efficient solution-processed non-doped electroluminescent devices

Taweesak Sudyoadsuk, Pongsakorn Chasing, Chaiyon Chaiwai, Thanyarat Chawanpunyawat, Terdkait Kaewpuang, Thanaporn Manyum, Supawadee Namuangruk and Vinich Promarak\*

Department of Material Science and Engineering, School of Molecular Science & Engineering, Vidyasirimedhi Institute of Science and Technology, Wangchan, Rayong 21210, Thailand

School of Chemistry, Institute of Science, Suranaree University of Technology, Nakhon Ratchasima 30000, Thailand

National Nanotechnology Center (NANOTEC), National Science and Technology Development Agency, Pathum Thani, 12120, Thailand

Research Network of NANOTEC-VISTEC on Nanotechnology for Energy, Vidyasirimedhi Institute of Science and Technology, Wangchan, Rayong, 21210, Thailand.

Correspondence: [vinich.p@vistec.ac.th](mailto:vinich.p@vistec.ac.th)

#### Materials Synthesis

**General method for Suzuki cross coupling reaction:** A mixture of aryl bromide (1.71 mmol), aryl borolane/aryl boronic acid, Pd(PPh<sub>3</sub>)<sub>4</sub> (0.05 mmol) and 2 M Na<sub>2</sub>CO<sub>3</sub> (15 ml) in THF (30 ml) was degassed with N<sub>2</sub> for 10 min. The mixture was stirred at reflux under N<sub>2</sub> for 24 h. After cooling, water (50 ml) was added, and the mixture was extracted with CH<sub>2</sub>Cl<sub>2</sub> (3 x 50 ml). The combined organic phase was washed with water (50 ml), brine solution (50 ml), dried over anhydrous Na<sub>2</sub>SO<sub>4</sub> and filtered. The solvent was removed to dryness and the crude product was purified by column chromatography on silica gel eluting with a mixture of CH<sub>2</sub>Cl<sub>2</sub>/hexane.

**General method for bromination reaction:** To a solution of the bis(hexylthiophenyl)-benzothiadiazoles (0.39 mmol) in THF (20 ml) was added with NBS in small portions. After completion, water was added and the mixture was extracted with CH<sub>2</sub>Cl<sub>2</sub> (3 x 50 ml). The combined organic phase was washed with water (50 ml), brine solution (50 ml), dried over anhydrous Na<sub>2</sub>SO<sub>4</sub> and filtered. The solvent was removed to dryness and the crude product was purified by column chromatography on silica gel eluting with a mixture of CH<sub>2</sub>Cl<sub>2</sub>/hexane.

#### **4,7-Bis(3-hexylthiophen-2-yl)-2,1,3-benzothiadiazole (2)**

Compound **2** was prepared from the reaction of **1** (0.50 g, 1.71 mmol) and 3-hexylthiophene-2-yl-4,4,5,5-tetramethyl-1,3,2-dioxaborolane (1.06 g, 3.61 mmol) and obtained as orange solids (0.78 g, 97%); m.p. 87-88 °C; <sup>1</sup>H-NMR (600 MHz, CDCl<sub>3</sub>) δ = 7.65 (s, 2H), 7.44 (d, *J* = 5.4 Hz, 2H), 7.11 (d, *J* = 5.4 Hz, 2H), 2.67 (t, *J* = 7.8 Hz, 4H), 1.65-1.60 (m, 4H), 1.26-1.18 (m, 12H), 0.81 (t, *J* = 6.6 Hz, 6H); <sup>13</sup>C-NMR (150 MHz, CDCl<sub>3</sub>) δ = 153.28, 140.68, 131.18, 128.88, 128.20, 126.48, 124.82, 30.53, 29.64, 28.33, 28.07, 21.49, 12.99; HRMS (MALDI-TOF) *clacd.* for C<sub>26</sub>H<sub>32</sub>N<sub>2</sub>S<sub>3</sub>: 468.1728 (M<sup>+</sup>), found: 468.1335.

#### **4,7-Bis(5-bromo-3-hexylthiophen-2-yl)-2,1,3-benzothiadiazole (3)**

Compound **3** was prepared from bromination of **2** (0.18 g, 0.39 mmol) with NBS (0.15 g, 0.81 mmol) and obtained as orange solids (0.23 g, 95%); m.p. 90-91 °C; <sup>1</sup>H-NMR (600 MHz, CDCl<sub>3</sub>)  $\delta$  = 7.06 (s, 2H), 7.05 (s, 2H), 2.60 (t, *J* = 7.8 Hz, 4H), 1.60-1.58 (m, 4H), 1.25-1.24 (m, 12H), 0.89-0.80(m, 6H); <sup>13</sup>C-NMR (150 MHz, CDCl<sub>3</sub>)  $\delta$  = 153.95, 142.46, 133.57, 132.01, 129.71, 126.66, 113.20, 31.94, 31.52, 30.50, 29.72, 29.42, 29.38, 29.03, 22.71, 22.51, 14.12, 14.01; HRMS (MALDI-TOF) clacd. for C<sub>26</sub>H<sub>30</sub>Br<sub>2</sub>N<sub>2</sub>S<sub>3</sub>: 625.9917 (M<sup>+</sup>), found: 626.1159.

**4,7-Bis(4,5-dibromo-3-hexylthiophen-2-yl)-2,1,3-benzothiadiazole (4)**

Compound **4** was prepared from bromination of **3** (0.23 g, 0.38 mmol) with NBS (0.26 g, 1.47 mmol) and obtained as orange solids (0.21 g, 73%); m.p. 97-98 °C; <sup>1</sup>H-NMR (600 MHz, CDCl<sub>3</sub>)  $\delta$  = 7.64 (s, 2H), 2.69 (t, *J* = 7.8 Hz, 4H), 1.53-1.26 (m, 16H), 0.88-0.77(m, 6H); <sup>13</sup>C-NMR (150 MHz, CDCl<sub>3</sub>)  $\delta$  = 153.93, 153.80, 153.75, 142.62, 142.45, 140.90, 138.72, 133.55, 133.20, 132.05, 132.00, 130.03, 129.86, 129.55, 127.03, 126.64, 117.66, 113.19, 112.51, 31.50, 31.24, 30.48, 29.70, 29.40, 29.34, 29.01, 28.95, 22.49, 22.45, 14.00, 13.96; HRMS (APCI) clacd. for C<sub>26</sub>H<sub>28</sub>Br<sub>4</sub>N<sub>2</sub>S<sub>3</sub>: 783.8107 (M<sup>+</sup> + 1), found: 784.8135.

**4,7-Bis(4-hexylthiophen-2-yl)-2,1,3-benzothiadiazole (5)**

Compound **5** was prepared from the reaction of **1** (0.70 g, 2.38 mmol) and 4-hexylthiophen-2-yl-4,4,5,5-tetramethyl-1,3,2-dioxaborolane (1.47g, 5.00 mmol) and obtained as orange solids (1.04 g, 93%); m.p. 93-94 °C; <sup>1</sup>H-NMR (500 MHz, CDCl<sub>3</sub>)  $\delta$  = 7.97 (s, 2H), 7.82 (s, 2H), 7.038 (s, 2H), 2.69 (t, *J* = 7.5 Hz, 4H), 1.73-1.67 (m, 4H), 1.40-1.32 (m, 12H), 0.90 (t, *J* = 6.5 Hz, 6H); <sup>13</sup>C-NMR (125 MHz, CDCl<sub>3</sub>)  $\delta$  = 152.65, 144.37, 139.01, 132.26, 129.62, 129.00, 126.03, 125.59, 125.54, 122.07, 121.53, 31.71, 30.67, 30.61, 30.49, 29.06, 22.64, 14.12; HRMS (MALDI-TOF) clacd. for C<sub>26</sub>H<sub>32</sub>N<sub>2</sub>S<sub>3</sub>: 468.1728 (M<sup>+</sup>), found: 468.1920.

**4,7-Bis(4-hexyl-5-bromothiophen-2-yl)-2,1,3-benzothiadiazole (6)**

Compound **6** was prepared from bromination of **5** (1.00 g, 1.39 mmol) with NBS (0.65 g, 2.91 mmol) and obtained as orange-red solids (1.51g, 98%); m.p. 98-99 °C; <sup>1</sup>H-NMR (500 MHz, CDCl<sub>3</sub>)  $\delta$  = 7.75 (s, 2H), 7.70 (s, 2H), 2.61 (t, *J* = 8 Hz, 4H), 1.67-1.64 (m, 4H), 1.55 (s, 6H), 1.42-1.33 (m, 14H), 0.90 (t, *J* = 6.5 Hz, 6H); <sup>13</sup>C-NMR (125 MHz, CDCl<sub>3</sub>)  $\delta$  = 152.25, 148.27, 143.61, 127.75, 125.44, 125.04, 32.25, 31.67, 30.06, 29.71, 28.96, 22.63, 14.12; HRMS (MALDI-TOF) clacd. for C<sub>26</sub>H<sub>30</sub>I<sub>2</sub>N<sub>2</sub>S<sub>3</sub>: 719.9660 (M<sup>+</sup>), found: 719.9730.

**4,7-Bis(3,5-dibromo-4-hexylthiophen-2-yl)-2,1,3-benzothiadiazole (7)**

Compound **7** was prepared from bromination of **6** (0.29 g, 0.59 mmol) with NBS (0.42 g, 2.39 mmol) and obtained as orange solids (0.22 g, 78%); m.p. 97-98 °C; <sup>1</sup>H-NMR (600 MHz, CDCl<sub>3</sub>)  $\delta$  = 8.06 (s, 2H), 2.75 (t, *J* = 9.6 Hz, 4H), 1.63-1.58 (m, 4H), 1.45-1.44(m, 4H), 1.42 (s, 8H), 1.37-1.34 (m, 6H); <sup>13</sup>C-NMR (150 MHz, CDCl<sub>3</sub>)  $\delta$  = 153.24, 150.06, 141.75, 132.84, 129.87, 125.97, 112.20, 111.53, 31.95, 31.59, 30.40, 29.68, 29.38, 28.67, 22.71, 22.65, 14.12; HRMS (MALDI-TOF) clacd. for C<sub>26</sub>H<sub>28</sub>Br<sub>4</sub>N<sub>2</sub>S<sub>3</sub>: 783.8107 (M<sup>+</sup>), found: 783.8642.

## Device Fabrication and Performance

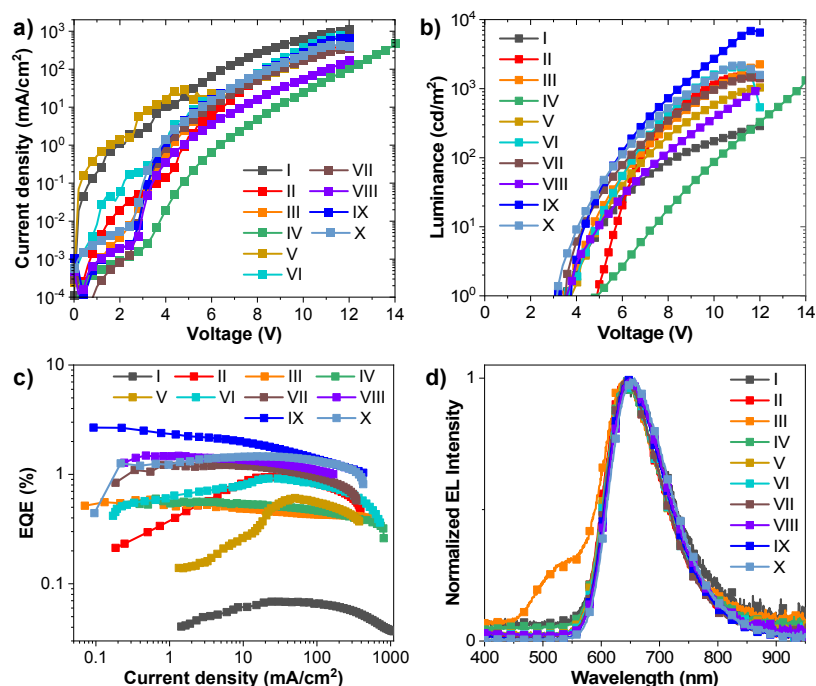

**Fig. S1.** a) Current density-voltage ( $J$ - $V$ ) characteristics. b) Luminance-voltage ( $L$ - $V$ ) characteristics. c) External quantum efficiency-current density ( $EQE$ - $J$ ) characteristics. d) Compared electroluminescence spectra of devices I to IV using **BTZ4** as EML.

**Table S1.** Electroluminescent data of non-doped OLEDs fabricated with **BTZ4** as EML

| Device <sup>a)</sup> | ETL                    | $V_{on}$<br>(V) | $L_{max}/J_{max}$<br>( $cd/m^2$ )/<br>( $mA/cm^2$ ) | $\lambda_{EL}$<br>(nm) | % $EQE_{max}$<br>at V | CE<br>( $cd/A$ ) <sup>b)</sup> | CIE (x,y)    |
|----------------------|------------------------|-----------------|-----------------------------------------------------|------------------------|-----------------------|--------------------------------|--------------|
| I                    | -                      | 3.4             | 287/                                                | 652                    | 0.07/5.2              | 0.03                           | (0.66, 0.34) |
| II                   | BCP(40 nm)             | 4.9             | 1518/                                               | 643                    | 0.94/7.2              | 0.66                           | (0.65, 0.35) |
| III                  | BCP(10 nm)/Alq3(40 nm) | 3.5             | 2247/                                               | 643                    | 0.94/3.4              | 0.48                           | (0.54, 0.42) |
| IV                   | BCP(20 nm)/Alq3(30 nm) | 5.1             | 1934/                                               | 644                    | 0.57/7.0              | 0.34                           | (0.65, 0.34) |
| V                    | TAZ(40nm)              | 3.8             | 1040/                                               | 644                    | 0.61/8.0              | 0.32                           | (0.66, 0.34) |
| VI                   | TAZ(30nm)/TPBi(10 nm)  | 3.8             | 2073/                                               | 644                    | 0.95/6.6              | 0.61                           | (0.66, 0.34) |
| VII                  | TPBi(10 nm)/TAZ(30nm)  | 3.5             | 1449/                                               | 645                    | 1.22/4.0              | 0.73                           | (0.66, 0.34) |
| VIII                 | TPBi(40nm)/TAZ(10nm)   | 3.6             | 1007/                                               | 649                    | 1.49/4.2              | 0.75                           | (0.66, 0.33) |
| IX                   | TPBi(50nm)             | 3.3             | 2334/636                                            | 650                    | 2.66/3.5              | 0.71                           | (0.66, 0.34) |
| X                    | TmPyPB(60nm)           | 3.1             | 2193/                                               | 657                    | 1.46/6.0              | 0.72                           | (0.67, 0.33) |

<sup>a)</sup> ITO/PEDOT:PSS(40 nm)/**BTZ4** (60 nm)/ETL/LiF(0.5 nm):Al(150 nm). <sup>b)</sup> Luminous efficiency at 100  $cd/m^2$

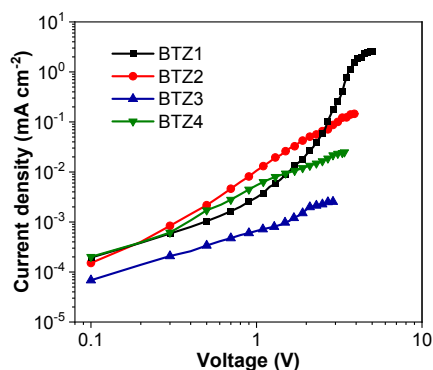

**Fig. S2** Current density-voltage ( $J$ - $V$ ) plots of electron only device (ITO/ $SnO_2$ /BTZn (120 nm)/LiF/Al).

# Materials Characterization Data (<sup>1</sup>H-NMR, <sup>13</sup>C-NMR and HRMS MALDI-TOF)

## BTZ1

CP\_PROTON8 CDC13 {C:\VISTEC NMR Data\VP} vptk 9

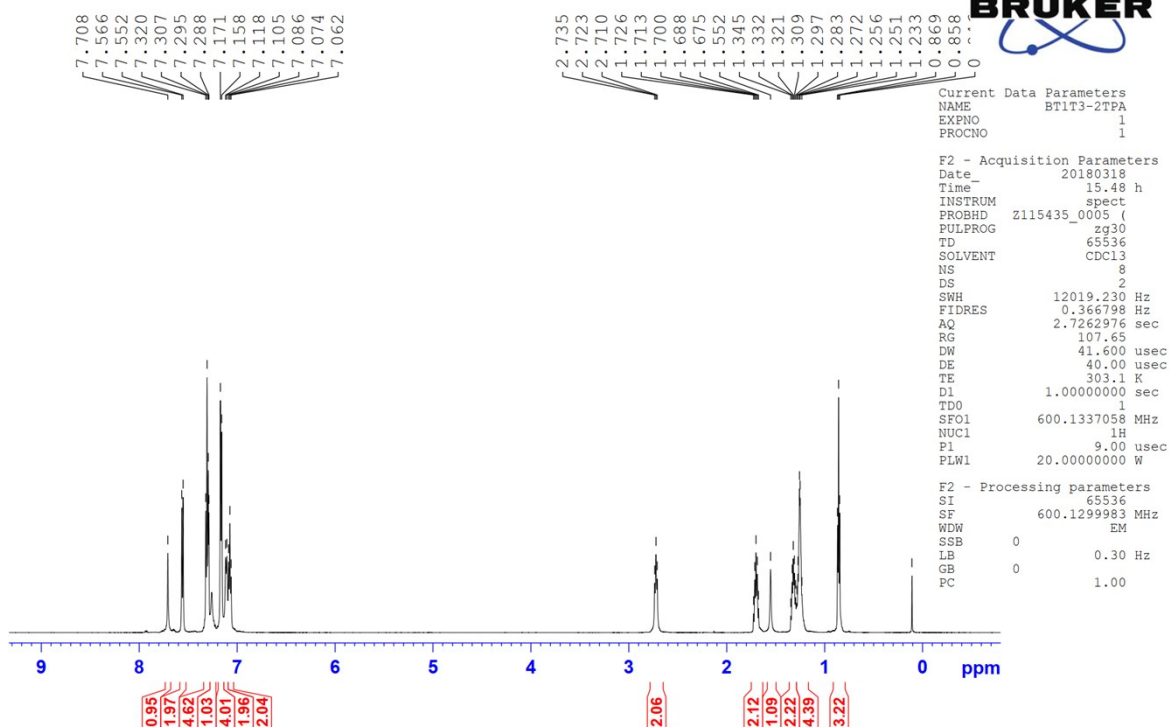

CP\_C13CPD32\_DE12 CDC13 {C:\VISTEC NMR Data\VP} vptk 9

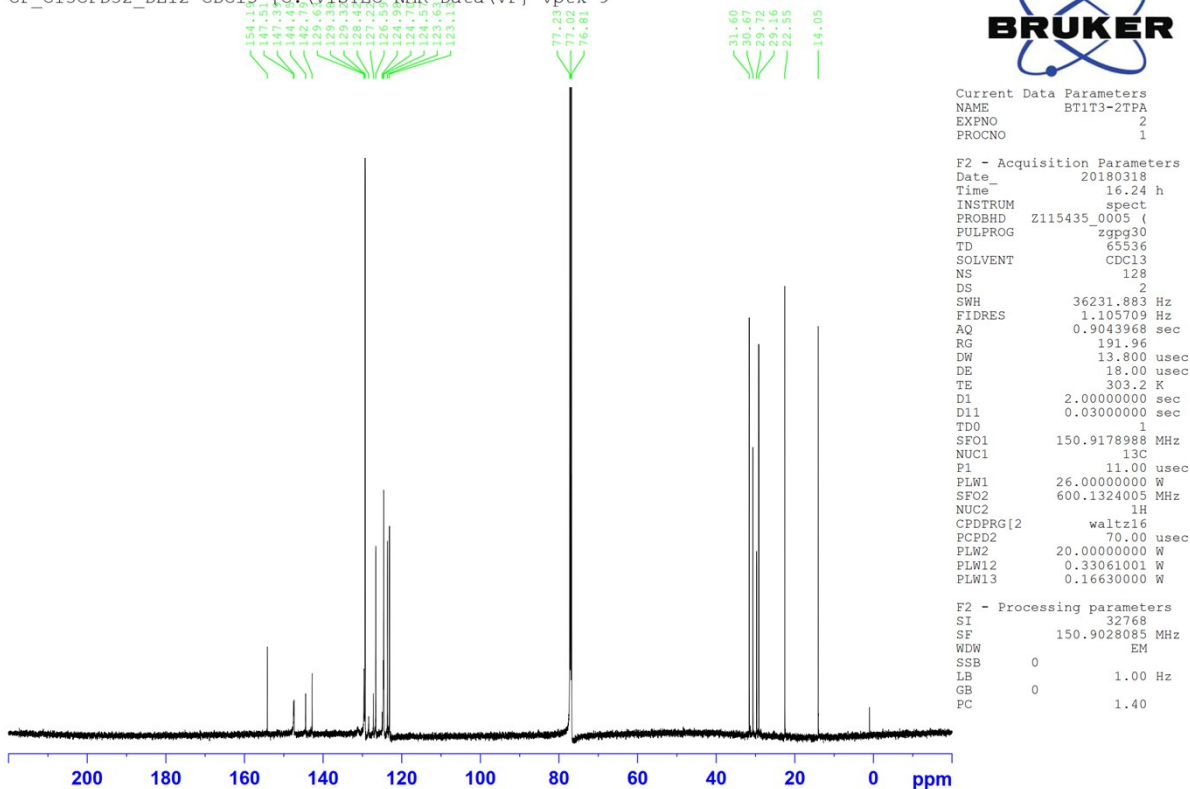

### MALDI-TOF-MS Report

Frontier Research Center, Vidyasirimedhi Institute of Science and Technology

Comment 1 m/z = 954.3824

Comment 2

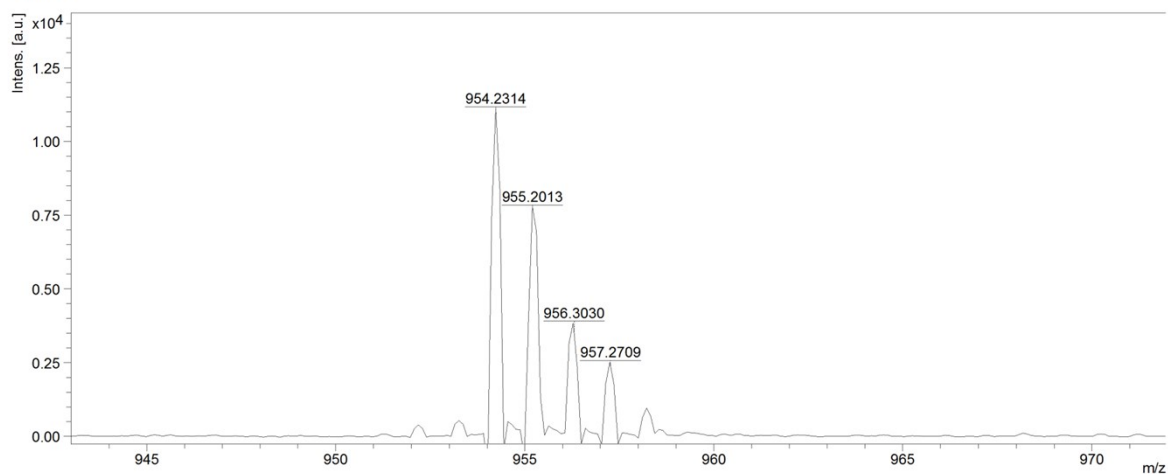

| m/z      | S/N | Quality Fac. | Res. | Intens. | Area |
|----------|-----|--------------|------|---------|------|
| 954.2314 |     |              |      | 11115   |      |
| 955.2013 |     |              |      | 7787    |      |
| 956.3030 |     |              |      | 3525    |      |
| 957.2709 |     |              |      | 2380    |      |

Bruker Autoflex Speed

Printout: 16/1/2018 1:58:52 PM

### BTZ2

BT1T3-4TPA in CDC13

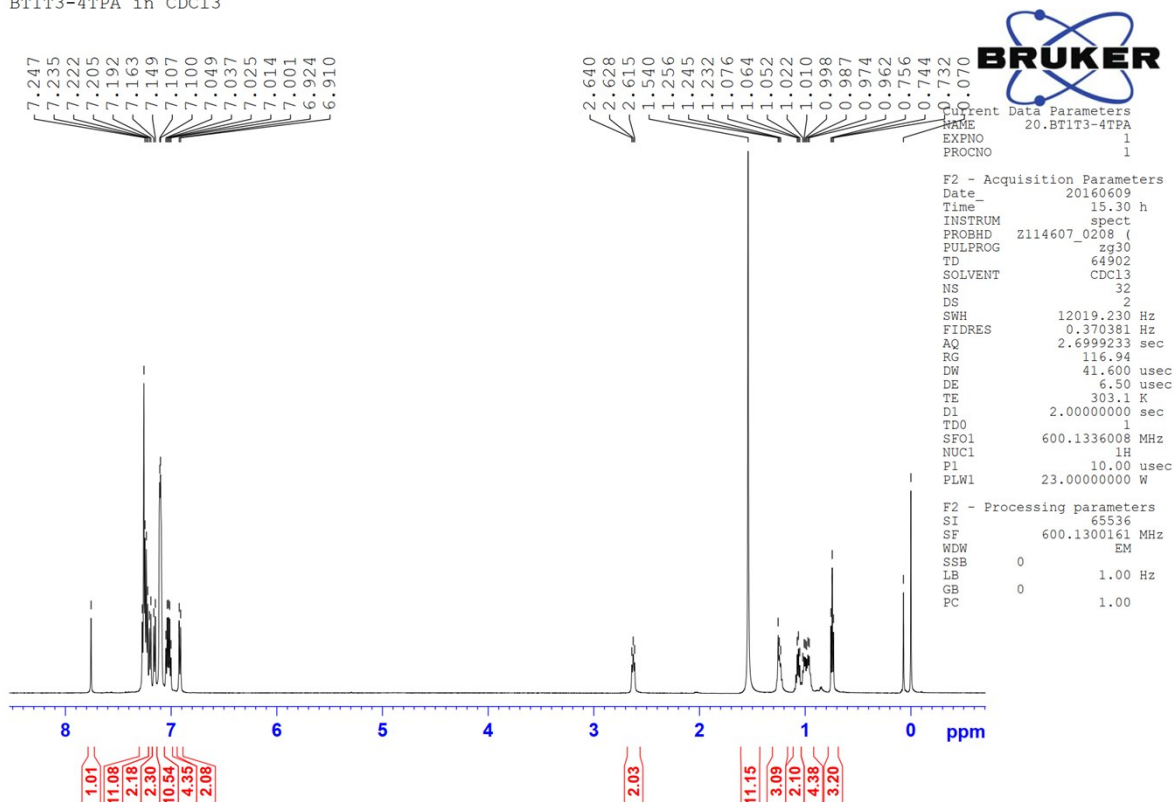

CP\_C13CPD32\_DE12 CDC13 {C:\VISTEC NMR Data\VP} vptk 15

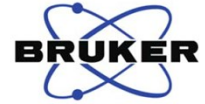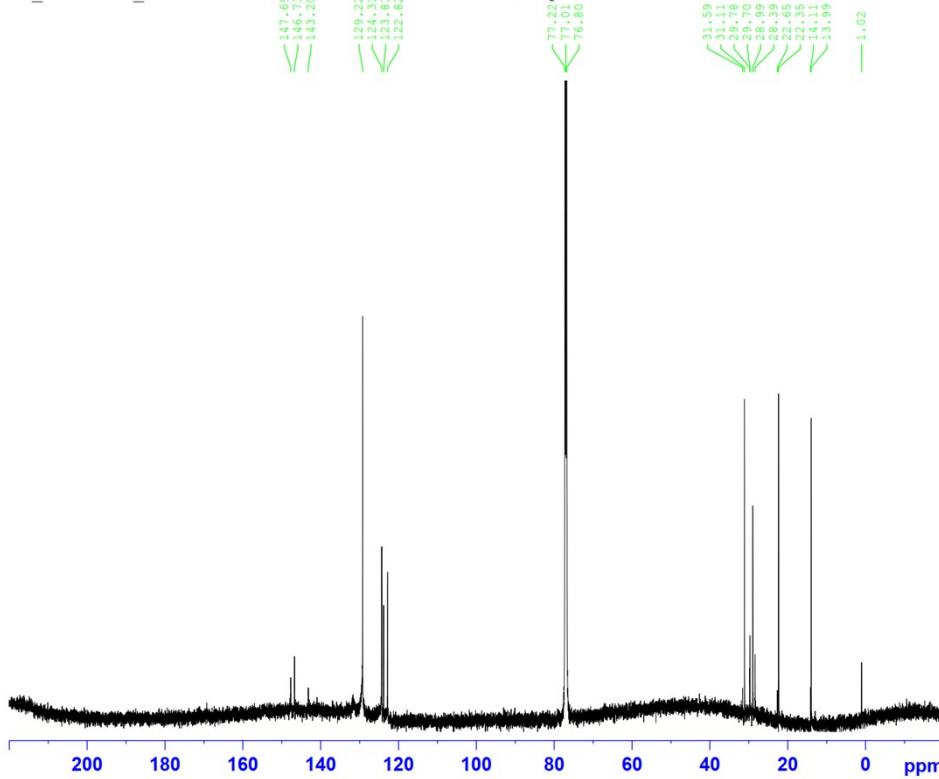

Current Data Parameters  
 NAME BT1T3-4TPA  
 EXPNO 10  
 PROCNO 1

F2 - Acquisition Parameters  
 Date\_ 20180321  
 Time 16.39 h  
 INSTRUM spect  
 PROBHD Z115435.0005 (  
 PULPROG zgpg30  
 TD 65536  
 SOLVENT CDC13  
 NS 512  
 DS 2  
 SWH 36231.883 Hz  
 FIDRES 1.105709 Hz  
 AQ 0.9043968 sec  
 RG 191.96  
 DW 13.800 usec  
 DE 18.00 usec  
 TE 303.1 K  
 D1 2.0000000 sec  
 D11 0.0300000 sec  
 TD0 1  
 SF01 150.9178988 MHz  
 NUC1 13C  
 P1 11.00 usec  
 PLW1 26.0000000 W  
 SF02 600.1324005 MHz  
 NUC2 1H  
 CPDPRG2 waltz16  
 PCPD2 70.00 usec  
 PLW2 20.0000000 W  
 PLW12 0.33061001 W  
 PLW13 0.16630000 W

F2 - Processing parameters  
 SI 32768  
 SF 150.9028085 MHz  
 WDW EM  
 SSB 0  
 LB 1.00 Hz  
 GB 0  
 PC 1.40

D:\Data\MSE\POSD\Ball\BT1T3-4TPA\0\_M5\1\MSRef

### MALDI-TOF-MS Report

Frontier Research Center, Vidyasirimedhi Institute of Science and Technology

Comment 1 m/z =1441.5953  
 Comment 2

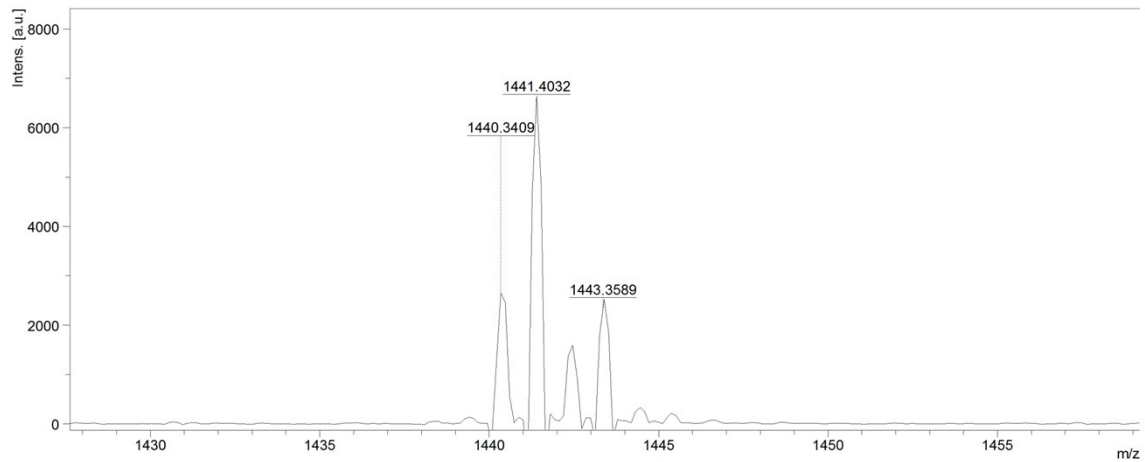

| m/z       | S/N | Quality Fac. | Res. | Intens. | Area |
|-----------|-----|--------------|------|---------|------|
| 658.2351  |     |              |      | 174     |      |
| 1440.3409 |     |              |      | 2656    |      |
| 1441.4032 |     |              |      | 6608    |      |
| 1443.3589 |     |              |      | 2353    |      |
| 2229.8822 |     |              |      | 285     |      |

Bruker Autoflex Speed

Printout: 16/1/2018 2:02:41 PM

# BTZ3

BT1T4-2TPA

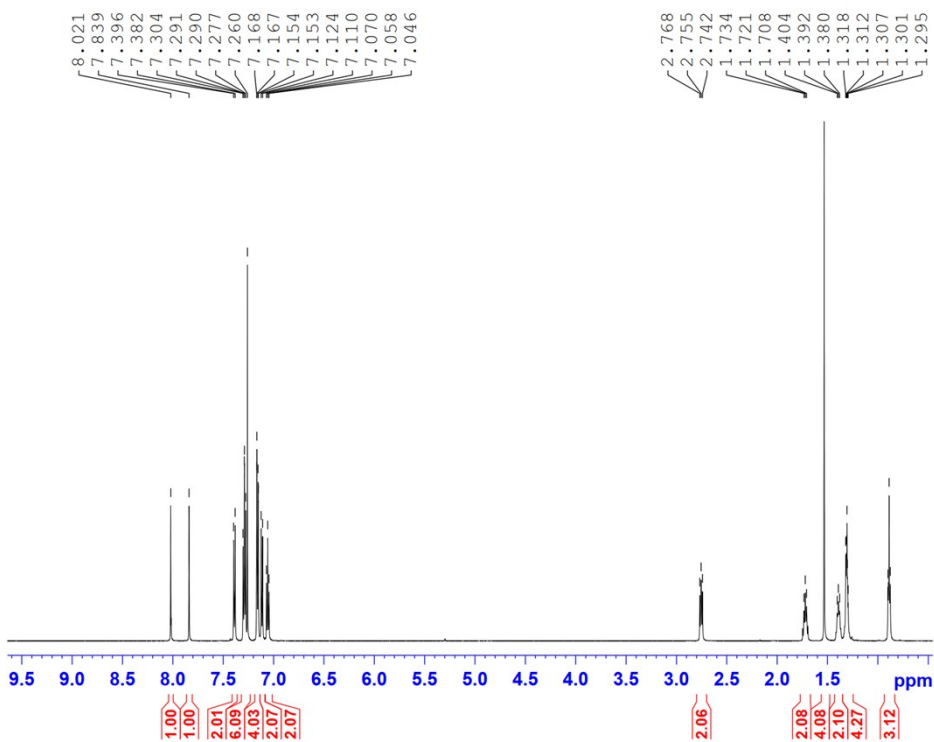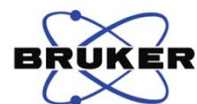

Current Data Parameters  
 NAME BT1T4-2TPA  
 EXPNO 1  
 PROCNO 1

F2 - Acquisition Parameters  
 Date\_ 20160219  
 Time 16.46 h  
 INSTRUM spect  
 PROBHD Z115435\_0005 (  
 PULPROG zg30  
 TD 65536  
 SOLVENT CDCl3  
 NS 8  
 DS 2  
 SWH 12019.230 Hz  
 FIDRES 0.366798 Hz  
 AQ 2.7262976 sec  
 RG 191.96  
 DW 41.600 usec  
 DE 40.00 usec  
 TE 303.1 K  
 D1 1.00000000 sec  
 TD0 1  
 SFO1 600.1337058 MHz  
 NUC1 1H  
 P1 8.50 usec  
 PLW1 20.00000000 W

F2 - Processing parameters  
 SI 65536  
 SF 600.1300146 MHz  
 WDW EM  
 SSB 0  
 LB 0.30 Hz  
 GB 0  
 PC 1.00

BT1T4-2TPA in CDCl3

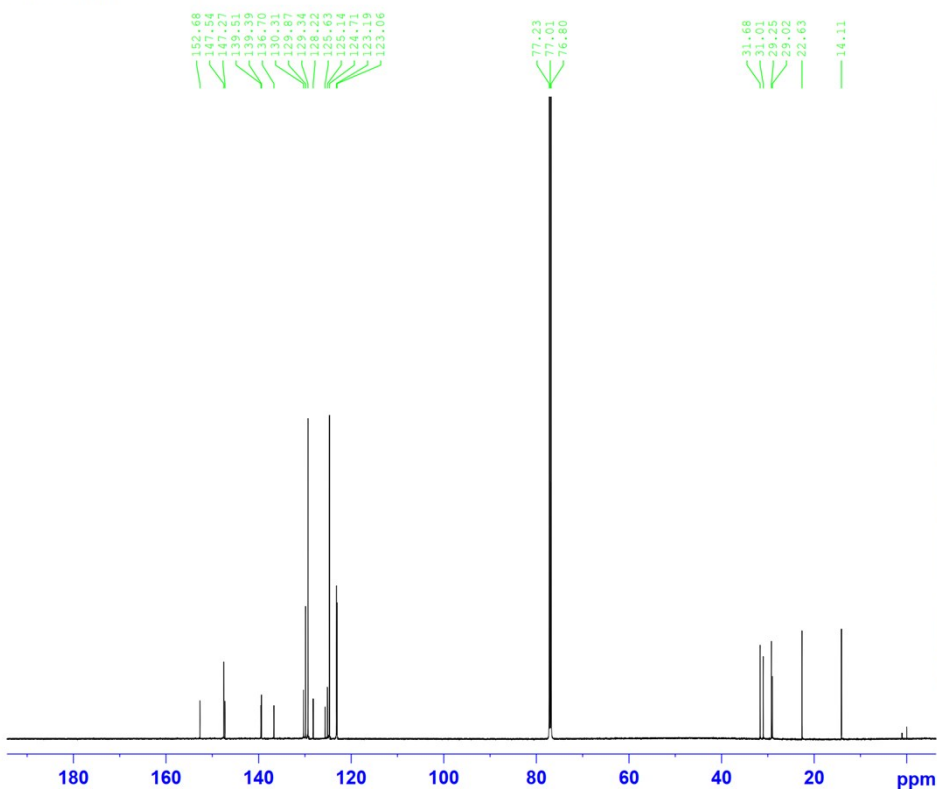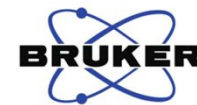

Current Data Parameters  
 NAME BT1T4-2TPA  
 EXPNO 2  
 PROCNO 1

F2 - Acquisition Parameters  
 Date\_ 20160317  
 Time 22.34 h  
 INSTRUM spect  
 PROBHD Z115435\_0005 (  
 PULPROG zgpg30  
 TD 65536  
 SOLVENT CDCl3  
 NS 128  
 DS 2  
 SWH 36231.883 Hz  
 FIDRES 1.105709 Hz  
 AQ 0.9043968 sec  
 RG 191.96  
 DW 13.800 usec  
 DE 18.00 usec  
 TE 303.1 K  
 D1 2.00000000 sec  
 D11 0.03000000 sec  
 TD0 1  
 SFO1 150.9178988 MHz  
 NUC1 13C  
 P1 10.50 usec  
 PLW1 26.00000000 W  
 SFO2 600.1324005 MHz  
 NUC2 1H  
 CPDPRG[2] waltz16  
 PCPD2 70.00 usec  
 PLW2 20.00000000 W  
 PLW12 0.29490000 W  
 PLW13 0.14833000 W

F2 - Processing parameters  
 SI 32768  
 SF 150.9028101 MHz  
 WDW EM  
 SSB 0  
 LB 1.00 Hz  
 GB 0  
 PC 1.40



### MALDI-TOF-MS Report

Frontier Research Center, Vidyasirimedhi Institute of Science and Technology

Comment 1 m/z = 954.3824

Comment 2

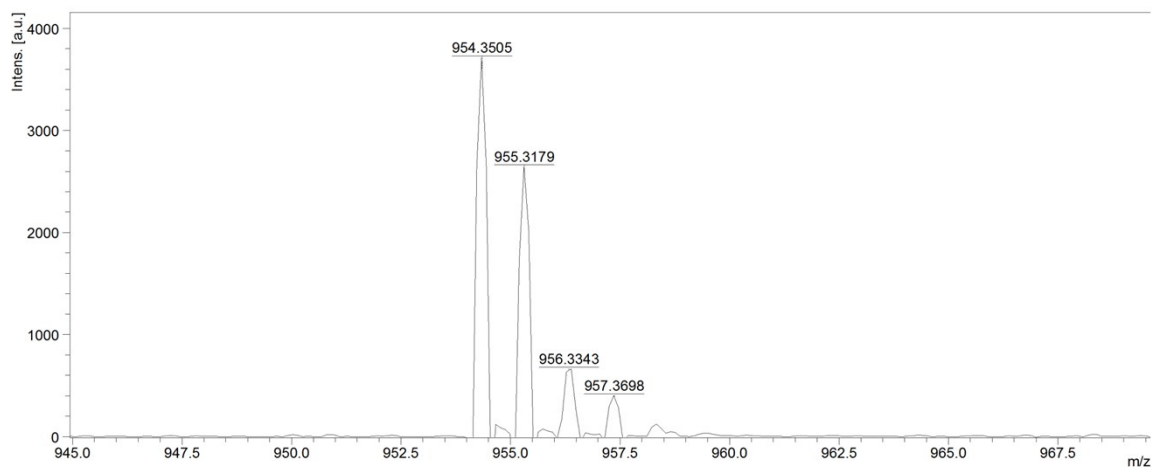

| m/z      | S/N | Quality Fac. | Res. | Intens. | Area |
|----------|-----|--------------|------|---------|------|
| 954.3505 |     |              |      | 3602    |      |
| 955.3179 |     |              |      | 2596    |      |
| 956.3343 |     |              |      | 650     |      |
| 957.3698 |     |              |      | 389     |      |

Bruker Autoflex Speed

Printout: 16/1/2018 2:10:39 PM

## BTZ4

BT1T4-4TPA

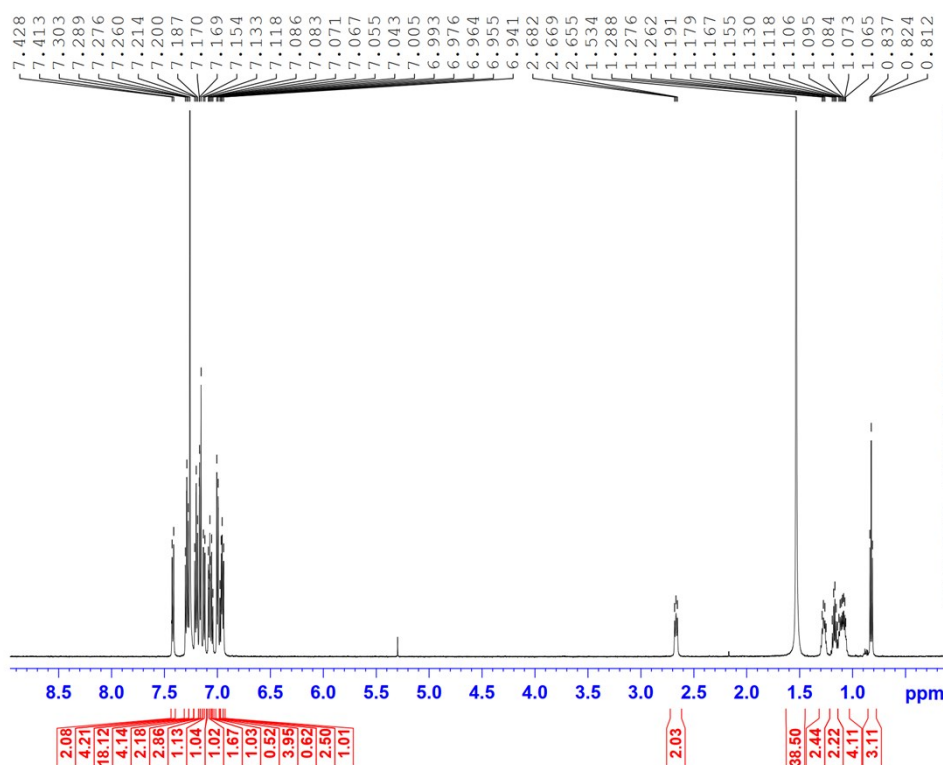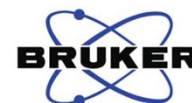

Current Data Parameters  
 NAME BT1T4-4TPA  
 EXPNO 1  
 PROCNO 1

F2 - Acquisition Parameters  
 Date\_ 20160219  
 Time 16.52 h  
 INSTRUM spect  
 PROBHD Z115435\_0005 ( )  
 PULPROG zg30  
 TD 65536  
 SOLVENT CDCl3  
 NS 8  
 DS 2  
 SWH 12019.230 Hz  
 FIDRES 0.366798 Hz  
 AQ 2.7262976 sec  
 RG 191.96  
 DW 41.600 usec  
 DE 40.00 usec  
 TE 303.2 K  
 D1 1.00000000 sec  
 TDO 1  
 SFO1 600.1337058 MHz  
 NUC1 1H  
 P1 8.50 usec  
 PLW1 20.00000000 W

F2 - Processing parameters  
 SI 65536  
 SF 600.1300147 MHz  
 WDW EM  
 SSB 0  
 LB 0.30 Hz  
 GB 0  
 PC 1.00



BT1T4-4TPA in CDCl3

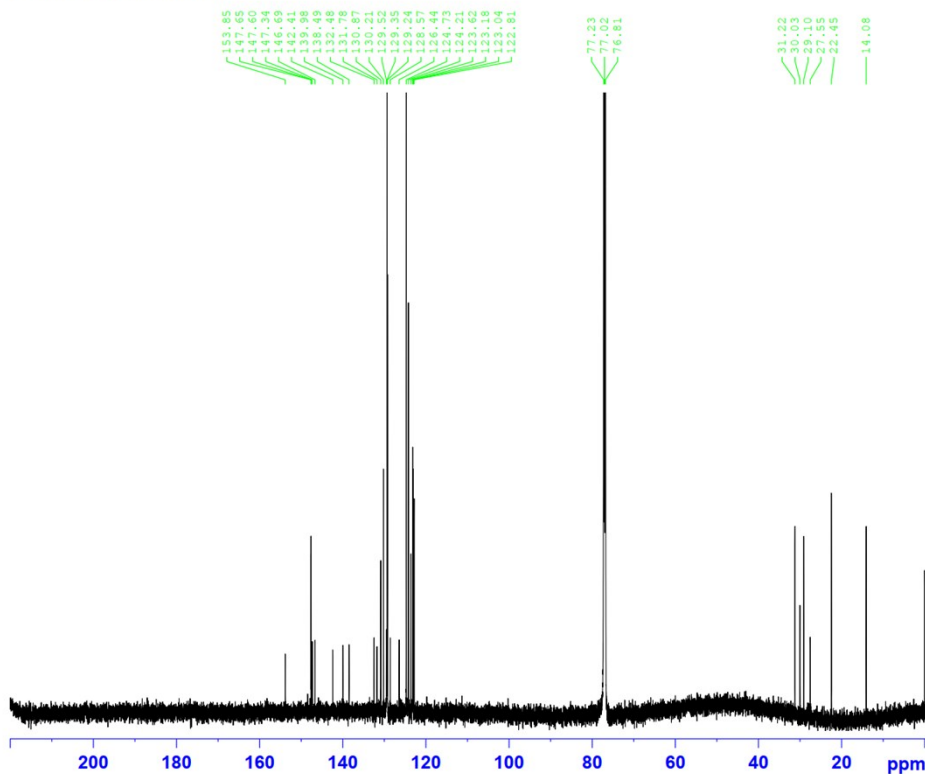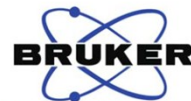

```

Current Data Parameters
NAME      BT1T4-4TPA
EXPNO    2
PROCNO   1

F2 - Acquisition Parameters
Date_    20160317
Time     22.17 h
INSTRUM  spect
PROBHD   z115435_0005 (
PULPROG  zgpg30
TD       65536
SOLVENT  CDCl3
NS       128
DS       2
SWH      36231.883 Hz
FIDRES   1.105709 Hz
AQ       0.9043968 sec
RG       191.96
DW       13.800 usec
DE       18.00 usec
TE       303.2 K
D1       2.0000000 sec
D11      0.03000000 sec
TD0      1
SFO1     150.9178988 MHz
NUC1     13C
F1       10.50 usec
PLW1    26.00000000 W
SFO2     600.1324005 MHz
NUC2     1H
CPDPRG2  waltz16
PCPD2    70.00 usec
PLW2    20.00000000 W
PLW12   0.29490000 W
PLW13   0.14833000 W

F2 - Processing parameters
SI       32768
SF       150.9028067 MHz
WDW      EM
SSB      0
LB       1.00 Hz
GB       0
PC       1.40
    
```

D:\Data\MSE\POSD\Ball\BT1T4-4TPA0\_N6\1\1SRef

### MALDI-TOF-MS Report

Frontier Research Center, Vidyasirimedhi Institute of Science and Technology

Comment 1 (MW=1441.5953)  
 Comment 2

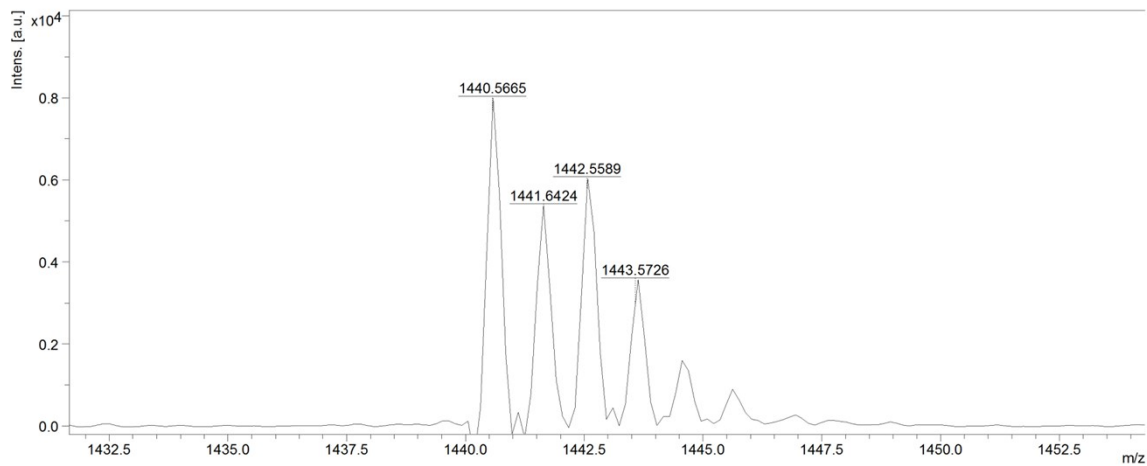

| m/z       | S/N | Quality Fac. | Res. | Intens. | Area |
|-----------|-----|--------------|------|---------|------|
| 442.9873  |     |              |      | 102     |      |
| 1440.5665 |     |              |      | 7561    |      |
| 1441.6424 |     |              |      | 5378    |      |
| 1442.5589 |     |              |      | 5775    |      |
| 1443.5726 |     |              |      | 2956    |      |

Bruker Autoflex Speed

Printout: 16/1/2018 2:13:02 PM

# Compound 2

BT1T3 in CDCl3

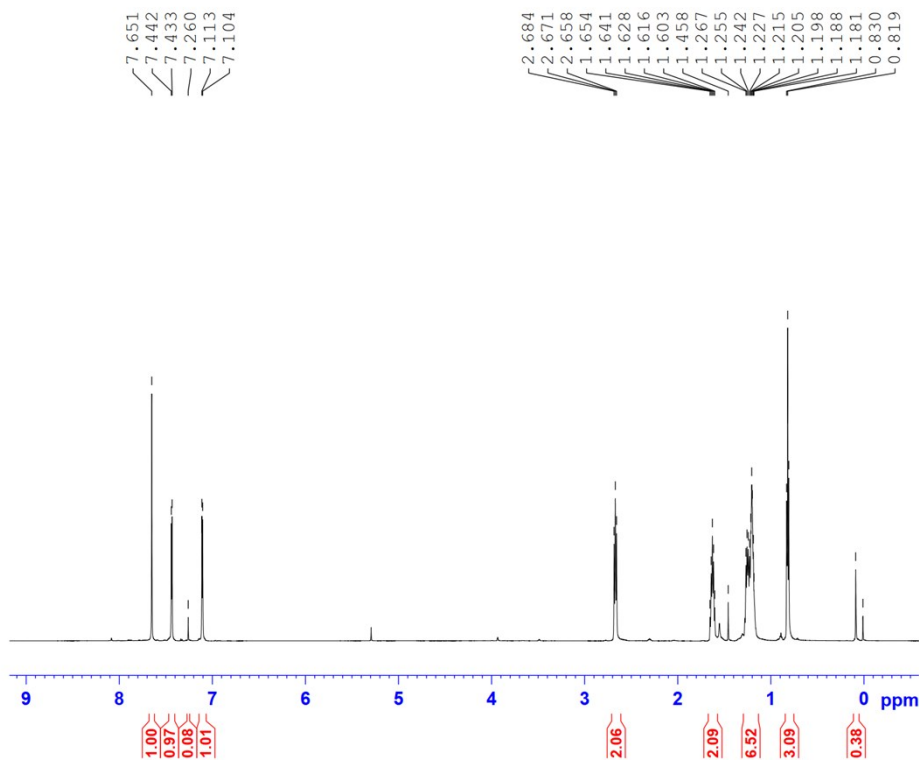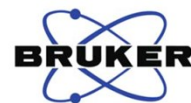

Current Data Parameters  
 NAME BT1T3(New)  
 EXPNO 1  
 PROCNO 1

F2 - Acquisition Parameters  
 Date\_ 20160307  
 Time 14.50 h  
 INSTRUM spect  
 PROBHD z115435\_0005 ( )  
 PULPROG zg30  
 TD 65536  
 SOLVENT CDCl3  
 NS 8  
 DS 2  
 SWH 12019.230 Hz  
 FIDRES 0.366798 Hz  
 AQ 2.7262976 sec  
 RG 31.68  
 DW 41.600 usec  
 DE 40.00 usec  
 TE 303.1 K  
 D1 1.00000000 sec  
 TD0  
 SFO1 600.1337058 MHz  
 NUC1 1H  
 P1 8.50 usec  
 PLW1 20.00000000 W

F2 - Processing parameters  
 SI 65536  
 SF 600.1300147 MHz  
 WDW EM  
 SSB 0  
 LB 0.30 Hz  
 GB 0  
 PC 1.00

BT1T3 in CDCl3

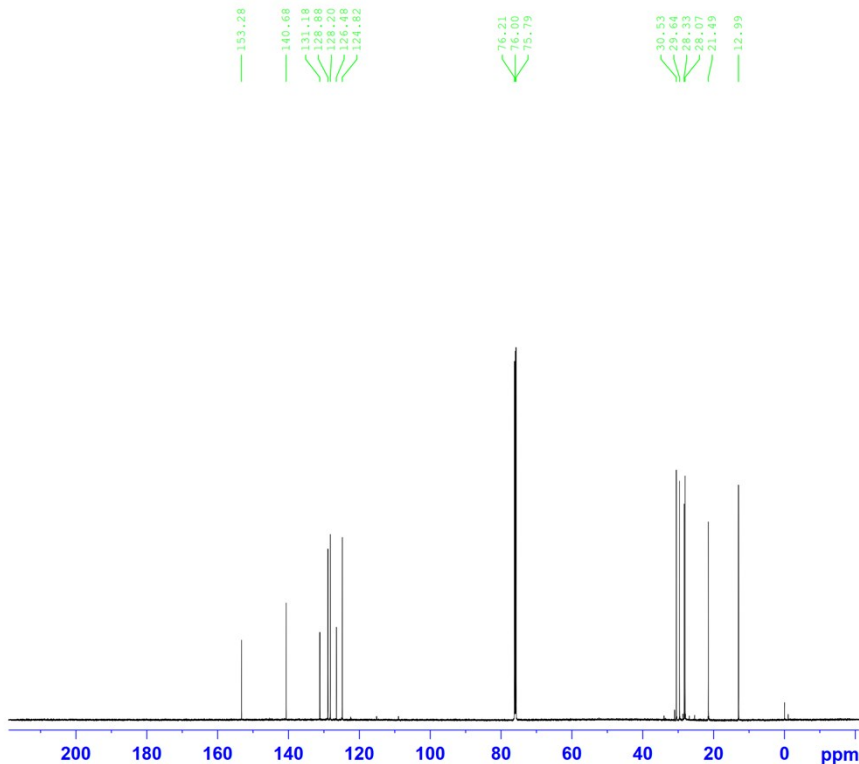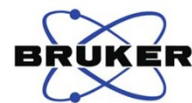

Current Data Parameters  
 NAME BT1T3(New)  
 EXPNO 2  
 PROCNO 1

F2 - Acquisition Parameters  
 Date\_ 20160307  
 Time 15.02 h  
 INSTRUM spect  
 PROBHD z115435\_0005 ( )  
 PULPROG zgpg30  
 TD 65536  
 SOLVENT CDCl3  
 NS 32  
 DS 2  
 SWH 36231.883 Hz  
 FIDRES 1.105709 Hz  
 AQ 0.9043968 sec  
 RG 191.96  
 DW 13.800 usec  
 DE 18.00 usec  
 TE 303.1 K  
 D1 2.00000000 sec  
 D11 0.03000000 sec  
 TD0 1  
 SFO1 150.9178988 MHz  
 NUC1 13C  
 P1 10.50 usec  
 PLW1 26.00000000 W  
 SFO2 600.1324005 MHz  
 NUC2 1H  
 CPDPRG[2] waltz16  
 PCPD2 70.00 usec  
 PLW2 20.00000000 W  
 PLW12 0.29490000 W  
 PLW13 0.14833000 W

F2 - Processing parameters  
 SI 32768  
 SF 150.9029649 MHz  
 WDW EM  
 SSB 0  
 LB 1.00 Hz  
 GB 0  
 PC 1.40

# Compound 3

BT1T3-2Br

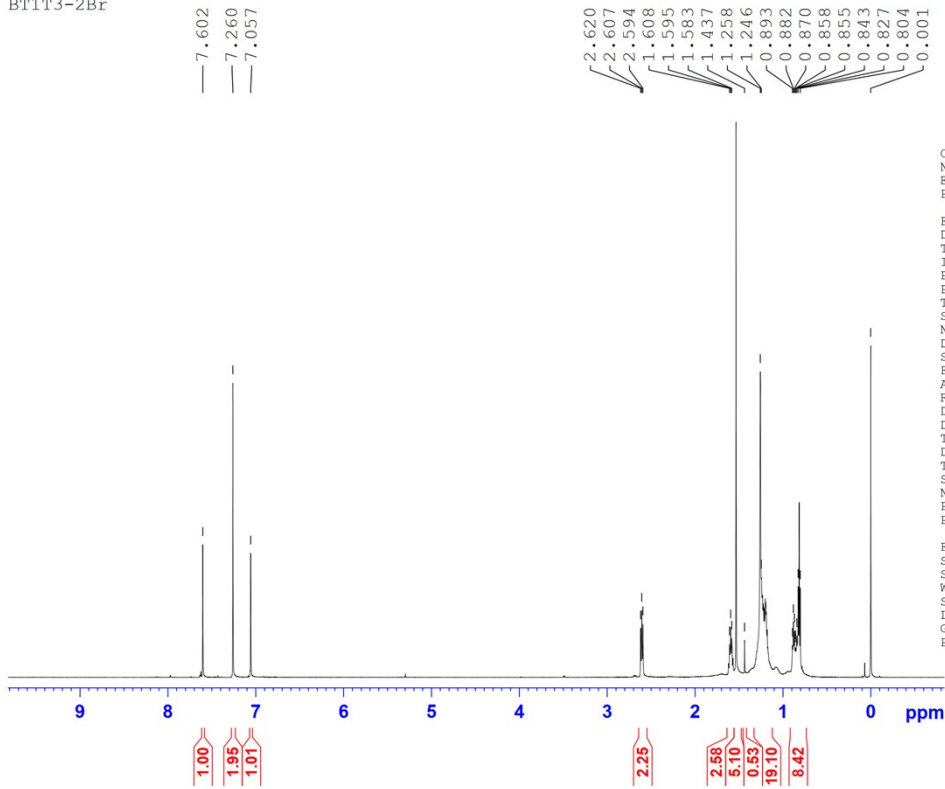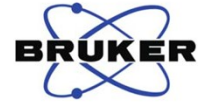

```

Current Data Parameters
NAME      BT1T3-2Br
EXPNO    1
PROCNO   1

F2 - Acquisition Parameters
Date_    20160308
Time     14.50 h
INSTRUM spect
PROBHD   Z115435_0005 (
PULPROG zg30
TD       65536
SOLVENT  CDCl3
NS       8
DS       2
SWH      12019.230 Hz
FIDRES   0.366798 Hz
AQ       2.7262976 sec
RG       191.96
DW       41.600 usec
DE       40.00 usec
TE       303.2 K
D1       1.00000000 sec
TD0      1
SF01     600.1337058 MHz
NUC1     1H
P1       8.50 usec
PLW1     20.00000000 W

F2 - Processing parameters
SI       65536
SF       600.1300148 MHz
WDW      EM
SSB      0
LB       0.30 Hz
GB       0
PC       1.00
    
```

BT1T3-2Br in CDCl3

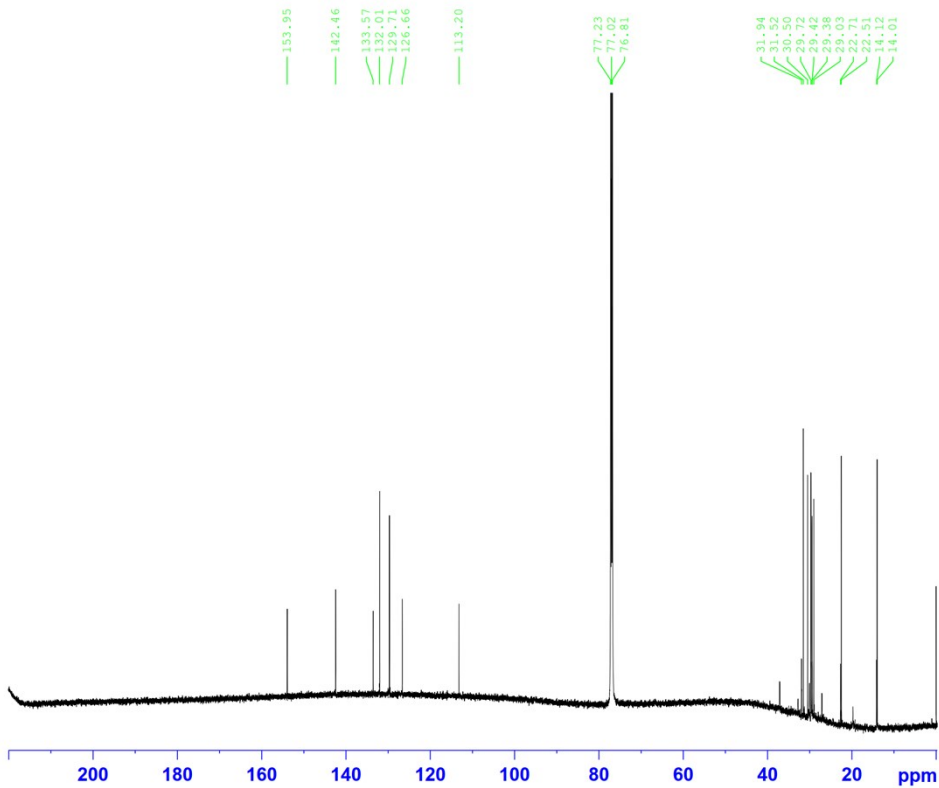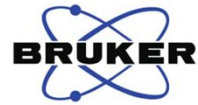

```

Current Data Parameters
NAME      BT1T3-2Br
EXPNO    3
PROCNO   1

F2 - Acquisition Parameters
Date_    20160308
Time     19.58 h
INSTRUM spect
PROBHD   Z115435_0005 (
PULPROG zgpg30
TD       65536
SOLVENT  CDCl3
NS       1024
DS       2
SWH      36231.883 Hz
FIDRES   1.105709 Hz
AQ       0.9043968 sec
RG       191.96
DW       13.800 usec
DE       18.00 usec
TE       303.2 K
D1       2.00000000 sec
D11      0.03000000 sec
TD0      1
SF01     150.9178988 MHz
NUC1     13C
P1       10.50 usec
PLW1     26.00000000 W
SF02     600.1324005 MHz
NUC2     1H
CPDPRG2 waltz16
PCPD2    70.00 usec
PLW2     20.00000000 W
PLW12    0.29490000 W
PLW13    0.14833000 W

F2 - Processing parameters
SI       32768
SF       150.9028058 MHz
WDW      EM
SSB      0
LB       1.00 Hz
GB       0
PC       1.40
    
```

# Compound 4

BT1T3-4Br in CDCl3

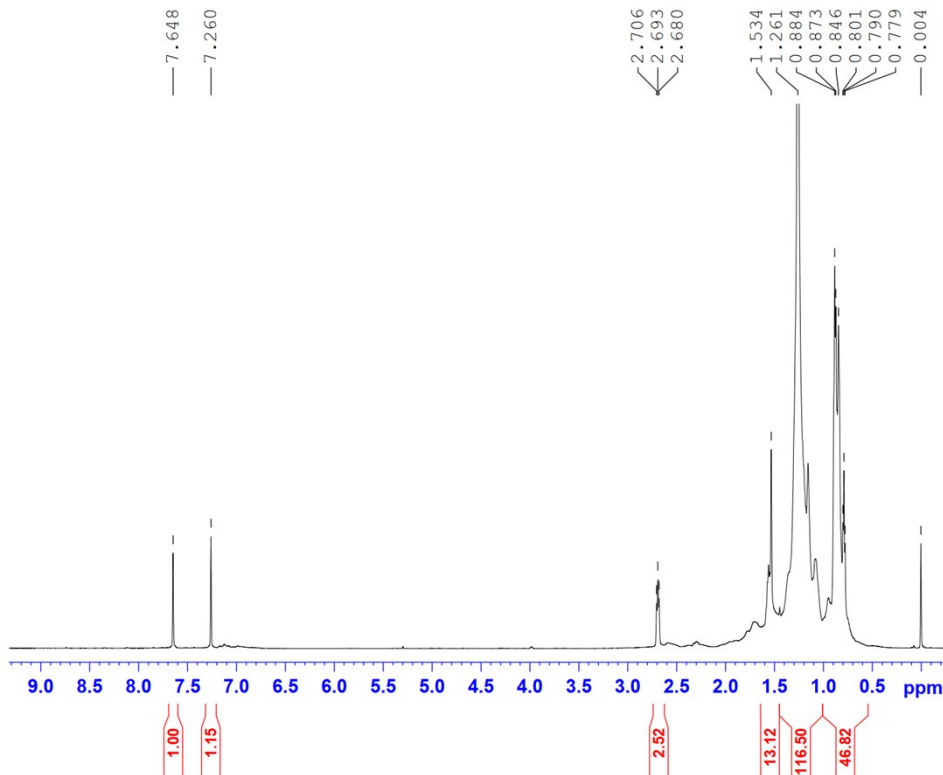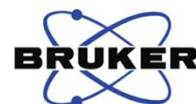

```
Current Data Parameters
NAME      BT1T3-4Br
EXPNO    1
PROCNO   1

F2 - Acquisition Parameters
Date_    20160317
Time     21.37 h
INSTRUM  spect
PROBHD   Z115435_0005 (
PULPROG  zg30
TD       65536
SOLVENT  CDCl3
NS       32
DS       2
SWH      12019.230 Hz
FIDRES   0.366798 Hz
AQ       2.7262976 sec
RG       59.53
DW       41.600 usec
DE       40.00 usec
TE       303.2 K
D1       1.00000000 sec
TD0      1
SFO1     600.1337058 MHz
NUC1     1H
P1       8.50 usec
PLW1     20.00000000 W

F2 - Processing parameters
SI       65536
SF       600.1300143 MHz
WDW      EM
SSB      0
LB       0.30 Hz
GB       0
PC       1.00
```

CP\_C13CPD32\_DE12 CDCl3 (C:\VISTEC NMR Data\VP} vptk 16

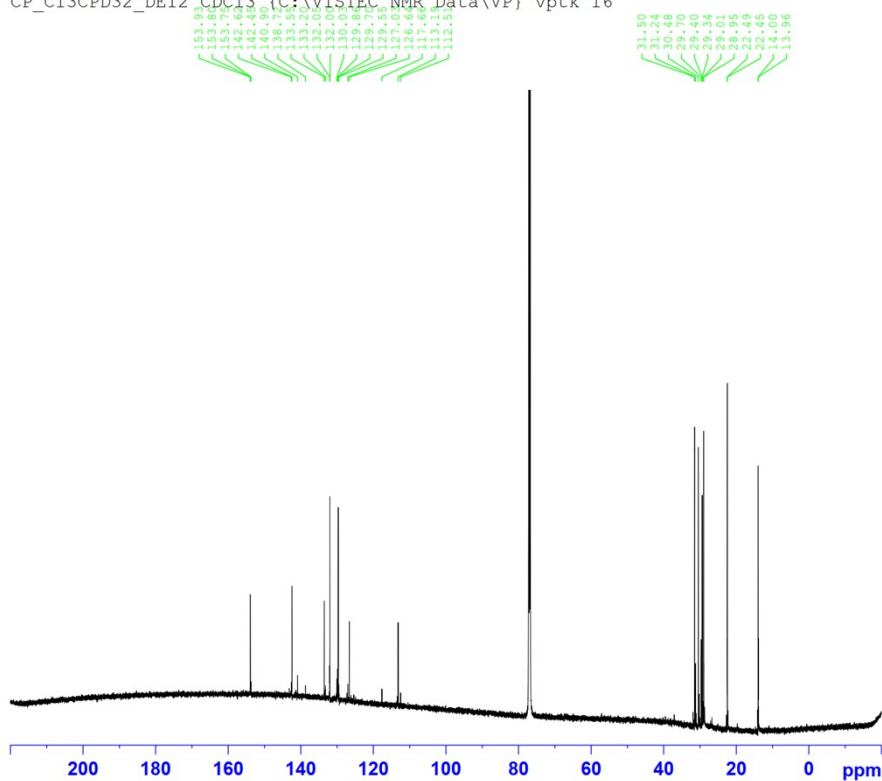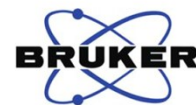

```
Current Data Parameters
NAME      BT1T3-4Br
EXPNO    10
PROCNO   1

F2 - Acquisition Parameters
Date_    20180321
Time     17.08 h
INSTRUM  spect
PROBHD   Z115435_0005 (
PULPROG  zpgp30
TD       65536
SOLVENT  CDCl3
NS       512
DS       2
SWH      36231.883 Hz
FIDRES   1.105709 Hz
AQ       0.9043968 sec
RG       191.96
DW       13.800 usec
DE       18.00 usec
TE       303.2 K
D1       2.00000000 sec
D11      0.03000000 sec
TD0      1
SFO1     150.9178988 MHz
NUC1     13C
P1       11.00 usec
PLW1     26.00000000 W
SFO2     600.1324005 MHz
NUC2     1H
CPDPRG[2] waltz16
PCPD2    70.00 usec
PLW2     20.00000000 W
PLW12    0.33061001 W
PLW13    0.16630000 W

F2 - Processing parameters
SI       32768
SF       150.9028085 MHz
WDW      EM
SSB      0
LB       1.00 Hz
GB       0
PC       1.40
```

# Compound 5

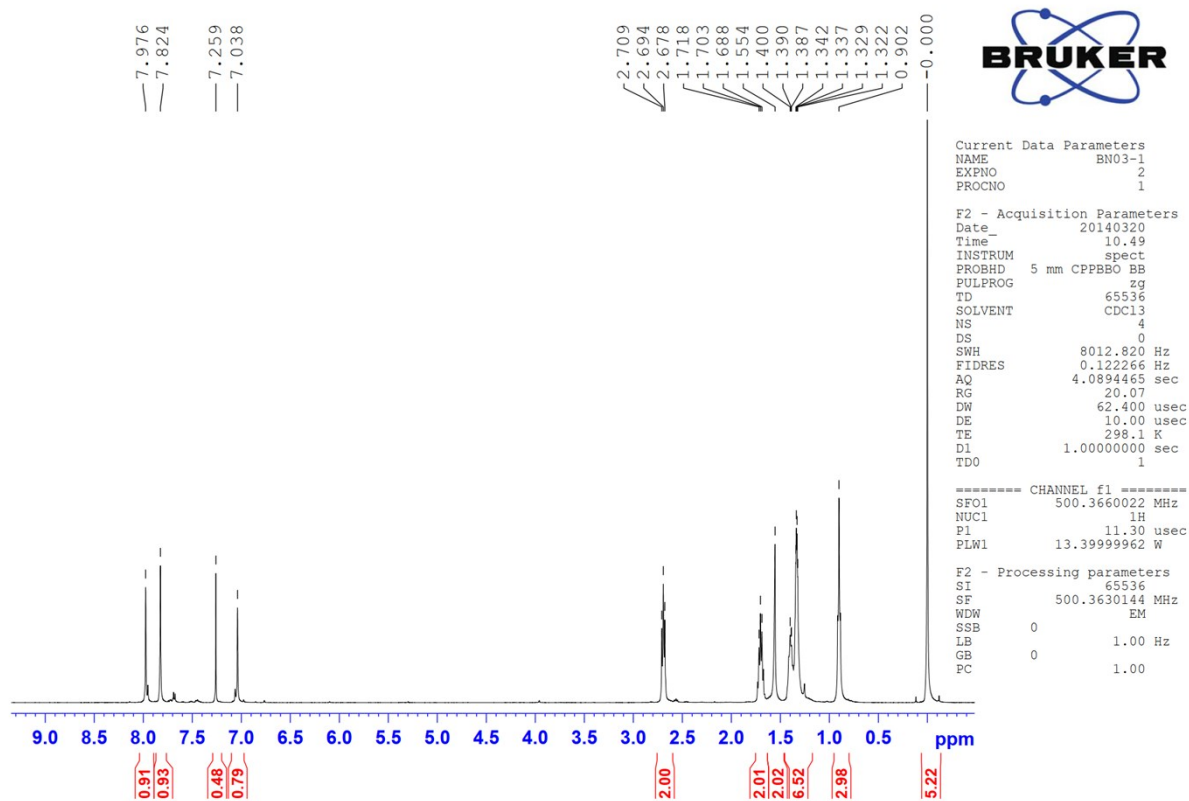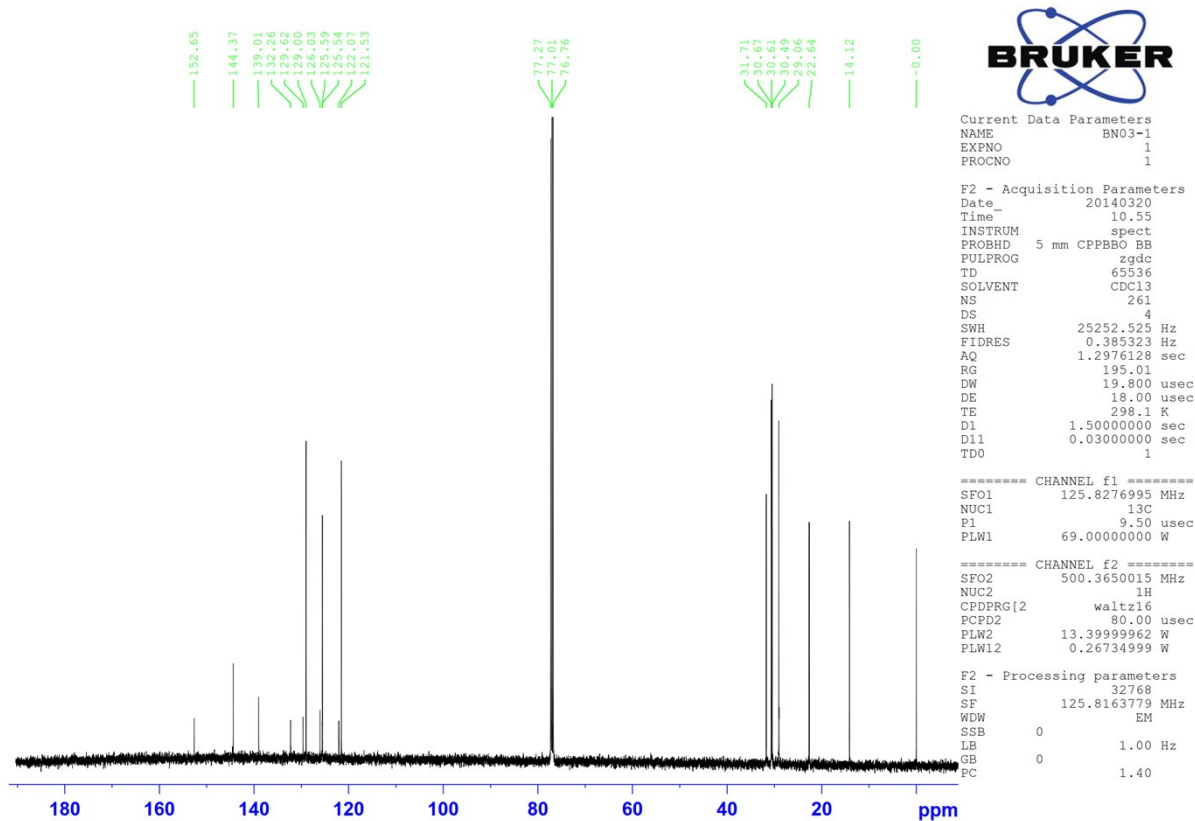

# Compound 6

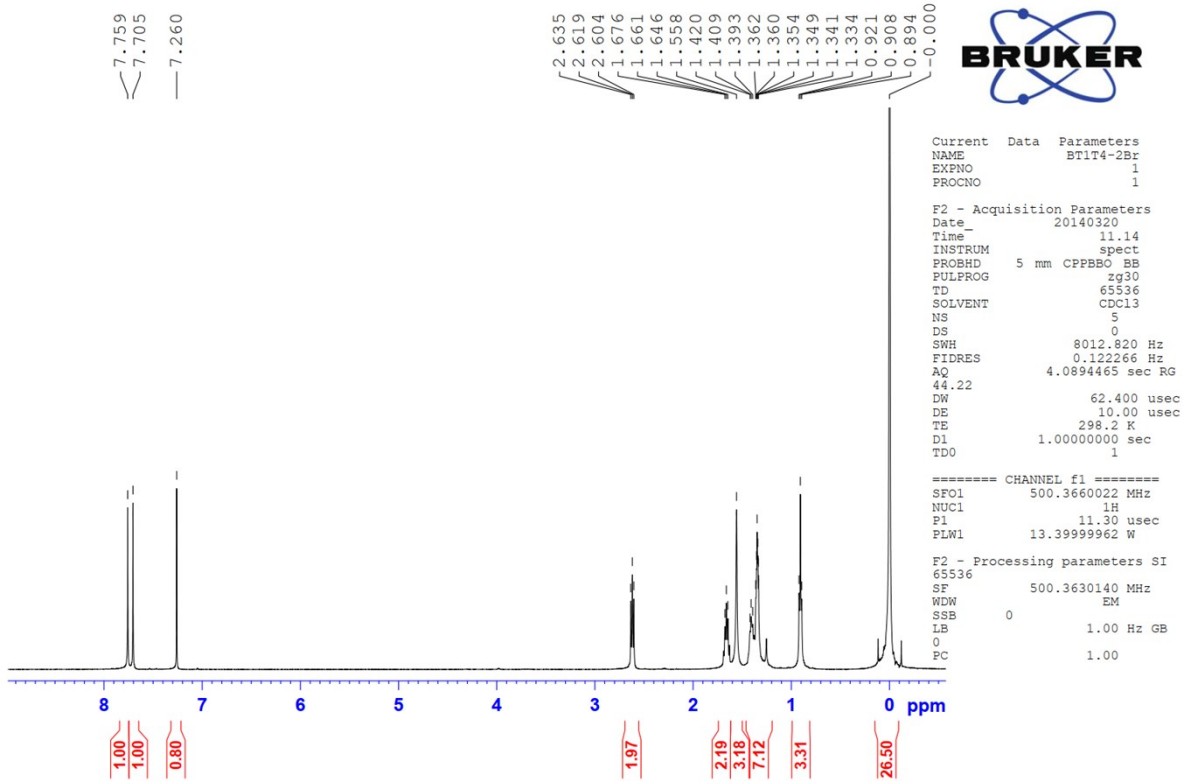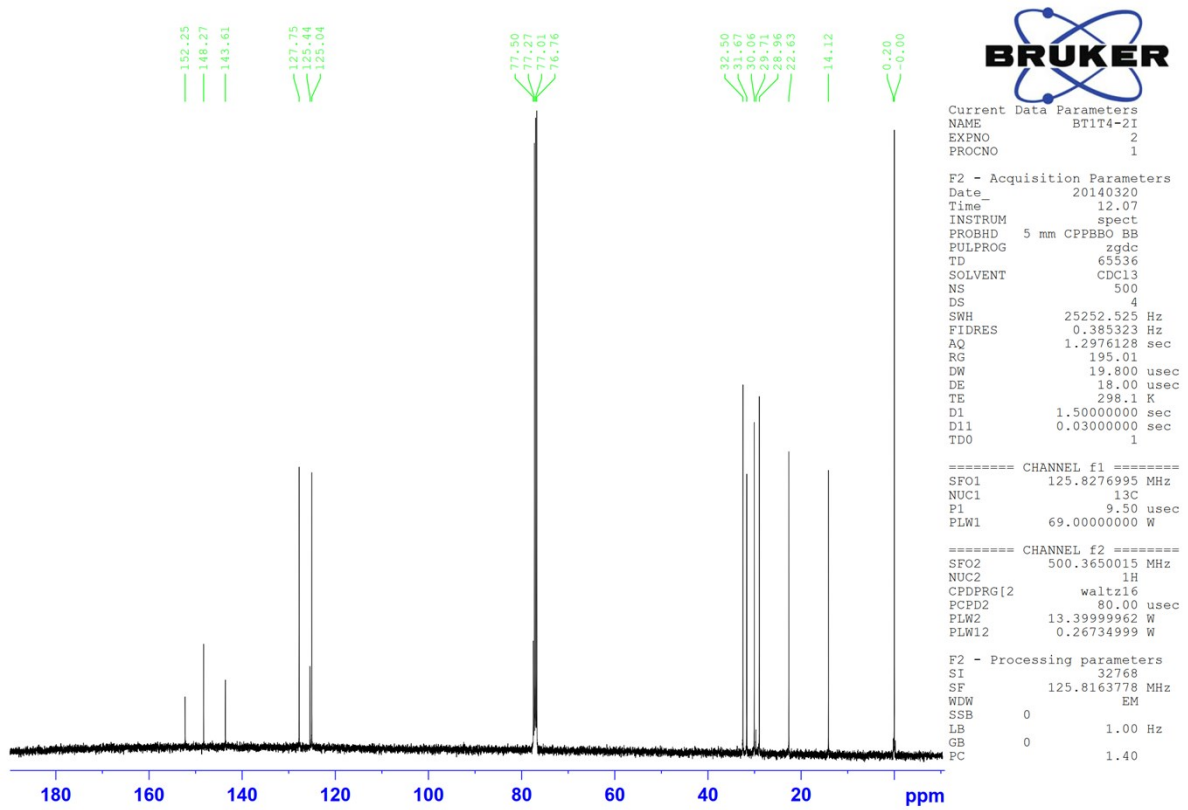



# Compound 7

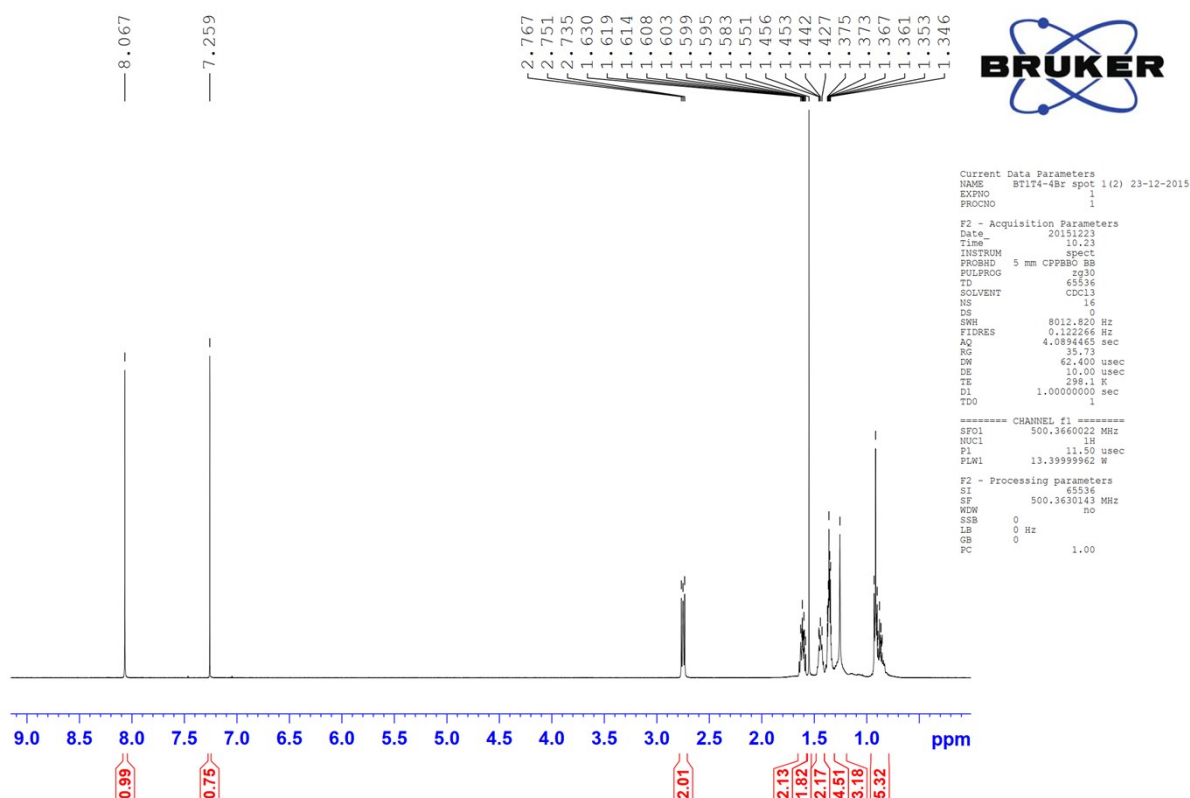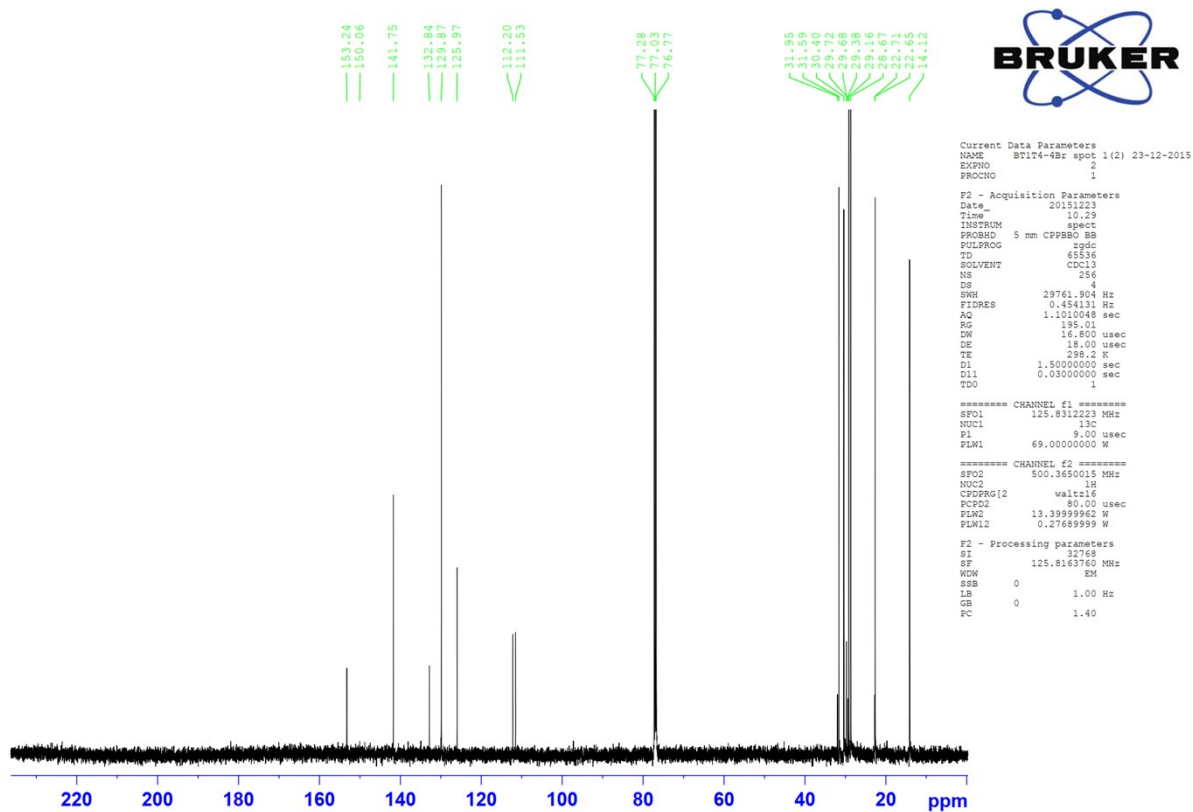

Supplement: d0tc02131h1.pdf [file d0tc02131h1.pdf]
